# Supplementary material for: Mechanism of Ca2+-Dependent Pro-Apoptotic Action of Selenium Nanoparticles, Mediated by Activation of Cx43 Hemichannels
Source: Biology (Basel). 2021 Aug 3;10(8):743. doi: 10.3390/biology10080743 (PMC8389560; doi:10.3390/biology10080743)
Supplement: Supplementary file 1 [file biology-10-00743-s001.zip › biology-1297406-supplementary.pdf]

Supplementary

# Mechanism of $\text{Ca}^{2+}$ -Dependent Pro-Apoptotic Action of Selenium Nanoparticles, Mediated by Activation of Cx43 Hemichannels

Egor A. Turovsky and Elena G. Varlamova

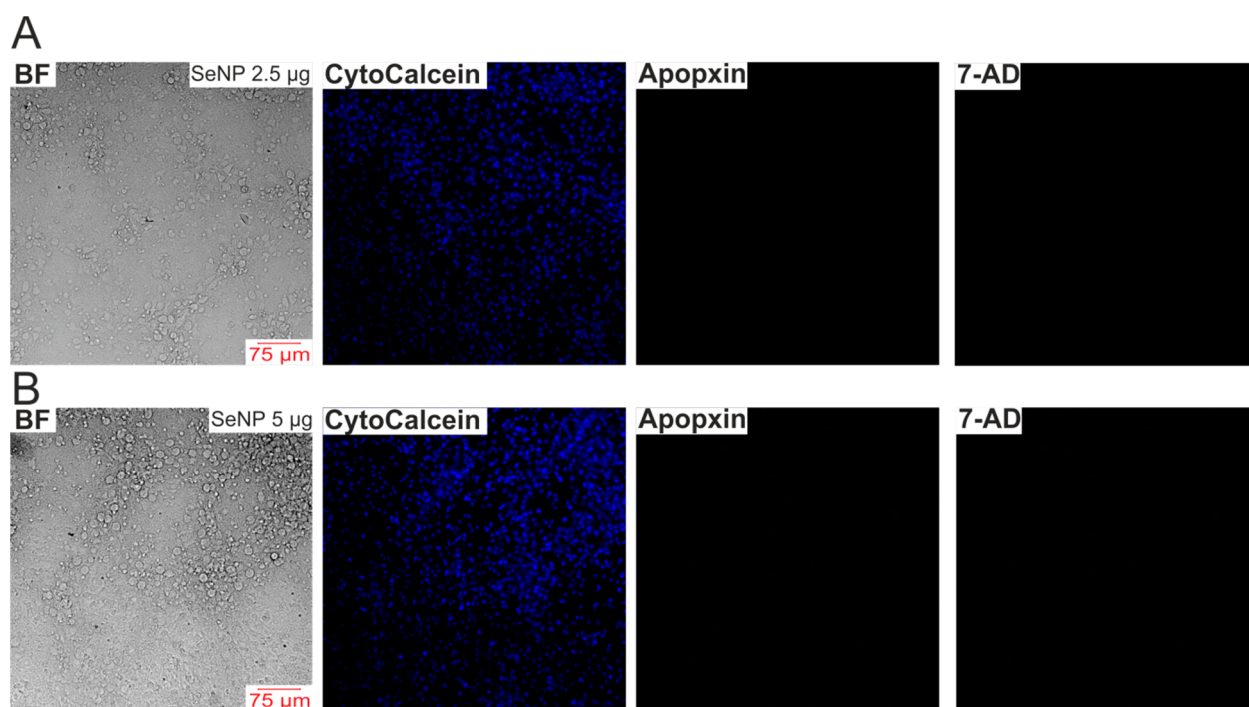

**Figure S1.** The SeNP concentrations used in experiments to measure the dynamics of  $[\text{Ca}^{2+}]_i$ , 2.5 µg/ml (A) and 5 µg/ml (B) after 30 minutes of incubation do not cause apoptosis and necrosis in A-172 cells. BF – bright-field microscopy, CytoCalcein – living cells indicator, Apopxin – apoptotic cells indicator and 7-AD (7-aminoactinomycin D) – necrotic cells indicator.
